# Supplementary material for: Mechanical performance of a CFRP composite reinforced via gelatin-CNTs: A study on fiber interfacial enhancement and matrix enhancement
Source: publisher site journal article supplement (doi:10.1515/ntrev-2022-0040), 2022-01-01
Supplement: Supplementary file 1 [file ntrev-2022-0040_sm.pdf]

## Supplementary material

The enlarged boundary SEM images of TFBT sample between the CF bundle and epoxy were added behind Figure S1(a) and (b). Firstly, the discontinuous boundary can be seen in Figure S1(c) marked by the red dashed line. Secondly, the high magnification image of boundary was shown in Figure S1(d) for determining the boundary, where the brittle carbon fiber was marked by the red circle and the flat epoxy resin was marked by the red rectangle. In one word, the boundary could be identified via zoom-in Figure S1(c) and (d). Finally, the thickness of CF bundle could be measured according to the boundary lines shown in Figure S1(c). Finally, the art image of Figure S1(b) is given in Figure S1(e), where the boundary between the black and grey zone clearly represents the boundary of carbon fiber and matrix (Tables S2–S6) (Figures S2–S4).

The thermal behavior and fiber volume were carried out by the thermogravimetric analysis (TGA8000, PerkinElmer Instruments) using TGA800 in a flowing nitrogen atmosphere from ambient temperature to 800 °C with a heating rate of 20 °C/min.

The fiber volume ( $V_f$ ) of composite could be calculated as follows:

$$V_f = \frac{\frac{W_f}{\rho_f}}{\frac{W_f}{\rho_f} + \frac{1 - W_f}{\rho_m}} \quad (1)$$

where  $V_f$  is the fiber weight fraction obtained by the TGA result,  $\rho_f$  and  $\rho_m$  are the density of carbon fiber and resin matrix respectively. The volume fraction of composites is summarized in Table S1.

**Table S1:** The main experimental materials

| Material        | Specification | Purity            | Supplier                                |
|-----------------|---------------|-------------------|-----------------------------------------|
| Epoxy           | RS-M135       | Analytical purity | PRF composite materials                 |
| Hardener        | RS-MH137      | Analytical purity | PRF composite materials                 |
| p-CNTs          | C139834-5g    | >95%              | Macklin                                 |
| C-CNTs          | C835676-5g    | >95%              | Aladdin                                 |
| Gelatin         | C41087-500g   | >99%              | Shanghai yuanye Bio-Technology Co., Ltd |
| NaOH            | 1310-73-2     | Analytical purity | Sinopharm Group                         |
| Acetone         | 776-99-8      | Analytical purity | Sinopharm Group                         |
| Ethanol         | 64-17-5       | Analytical purity | Sinopharm Group                         |
| Filter membrane | 2 µm          | Analytical purity | Shanghai New Asia                       |
| Release agent   | Easy-Lease200 | Analytical purity | Easycocomposites                        |

**Table S2:** The IFNS of TFBT samples *via* fiber enhancement

| Nanofiller | Concentration/<br>mg mL <sup>-1</sup> | Time/min | IFNS/<br>MPa | Error/<br>MPa |
|------------|---------------------------------------|----------|--------------|---------------|
| C-CNTs     | 0.05                                  | 1        | 24.23        | 4.83          |
|            |                                       | 2        | 24.85        | 4.52          |
|            |                                       | 5        | 26.79        | 5.87          |
|            | 0.1                                   | 1        | 28.28        | 3.48          |
|            |                                       | 2        | 26.27        | 2.54          |
|            |                                       | 5        | 26.94        | 4.52          |
| g-CNTs     | 0.05                                  | 1        | 22.53        | 2.16          |
|            |                                       | 2        | 26.91        | 2.21          |
|            |                                       | 5        | 20.76        | 1.51          |
|            | 0.1                                   | 1        | 26.13        | 2.66          |
|            |                                       | 2        | 31.49        | 2.66          |
|            |                                       | 5        | 28.62        | 2.29          |

**Table S3:** The IFNS of TFBT samples *via* matrix enhancement

| Nanofiller | Loading content/wt% | IFNS/MPa | Error/MPa |
|------------|---------------------|----------|-----------|
| Neat       | —                   | 22.44    | 2.10      |
| p-CNTs     | 0.05                | 24.09    | 3.71      |
|            | 0.1                 | 26.20    | 3.58      |
|            | 0.2                 | 18.48    | 6.03      |
| C-CNTs     | 0.05                | 27.18    | 4.58      |
|            | 0.1                 | 27.50    | 2.42      |
|            | 0.2                 | 26.61    | 5.82      |
| g-CNTs     | 0.05                | 27.98    | 4.72      |
|            | 0.1                 | 29.50    | 2.22      |
|            | 0.2                 | 28.61    | 2.29      |

**Table S4:** The volume fraction of composites

| Composite | V <sub>f</sub> /% |
|-----------|-------------------|
| Sample 1  | 52.16             |
| Sample 2  | 55.04             |
| Sample 3  | 52.68             |
| Sample 4  | 54.16             |
| Average   | 53.51             |

**Table S5:** Flexural properties various composites *via* matrix enhancement

| Composite    | Loading<br>content/<br>wt% | Strength/<br>MPa | Error/<br>MPa | Modulus/<br>GPa | Error/GPa |
|--------------|----------------------------|------------------|---------------|-----------------|-----------|
| Neat         | —                          | 679.23           | 51.70         | 52.78           | 5.04      |
| CF/p-CNTs@EP | 0.05                       | 661.94           | 26.86         | 50.36           | 4.04      |
|              | 0.1                        | 675.93           | 15.53         | 58.98           | 2.51      |
|              | 0.2                        | 651.23           | 28.00         | 44.59           | 3.47      |
| CF/C-CNTs@EP | 0.05                       | 674.78           | 3.84          | 49.56           | 3.96      |
|              | 0.1                        | 730.51           | 30.47         | 57.86           | 4.50      |
|              | 0.2                        | 703.04           | 53.16         | 57.52           | 5.25      |
| CF/g-CNTs@EP | 0.05                       | 783.20           | 30.33         | 55.25           | 3.68      |
|              | 0.1                        | 813.43           | 39.98         | 67.83           | 4.55      |
|              | 0.2                        | 769.25           | 11.75         | 61.93           | 4.06      |

**Table S6:** Comparison of flexural properties between matrix enhancement and fiber enhancement composite

| Enhancement        | Composite    | Parameters       | Strength/MPa | Error/MPa | Modulus/GPa | Error/GPa |
|--------------------|--------------|------------------|--------------|-----------|-------------|-----------|
| —                  | Neat         | —                | 679.23       | 51.69     | 52.78       | 5.04      |
| Matrix enhancement | CF/C-CNTs@EP | 0.1wt %          | 730.50       | 30.48     | 57.87       | 4.45      |
|                    | CF/g-CNTs@EP | 0.1 wt%          | 813.43       | 39.99     | 67.83       | 4.55      |
| Fiber enhancement  | C-CNTs@CF/EP | 0.1 mg/mL, 1 min | 807.36       | 17.40     | 60.13       | 2.74      |
|                    | g-CNTs@CF/EP | 0.1 mg/mL, 2 min | 828.02       | 30.51     | 66.14       | 1.07      |

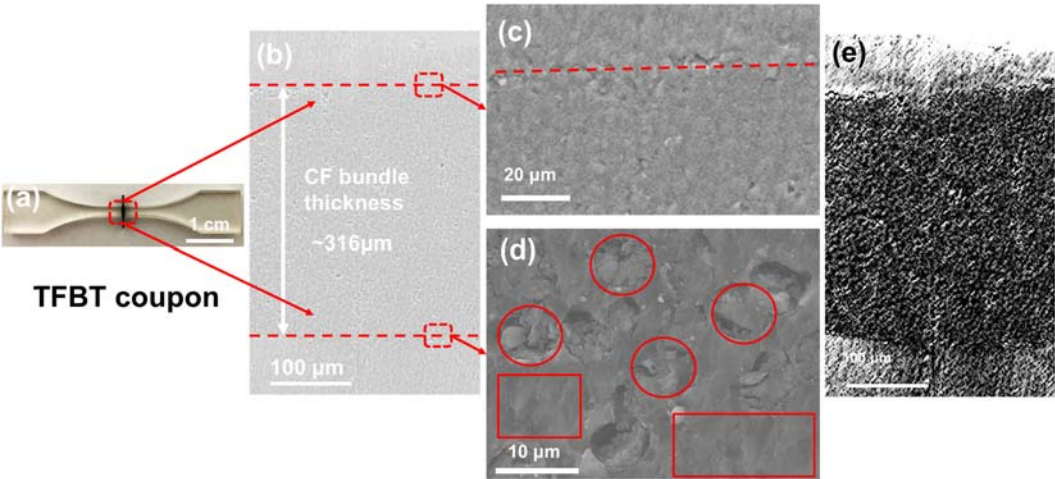

**Figure S1:** Optical image of TFBT sample (a), cross section SEM image (b), high resolution image of upper (c) and lower (d) boundary between CF bundle and epoxy resin. The art image (e) for image (b).

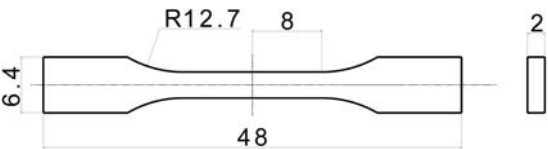

**Figure S2:** Sample dimensions of transverse fiber bundle tensile test based on ASTM D638, all dimensions are in mm.

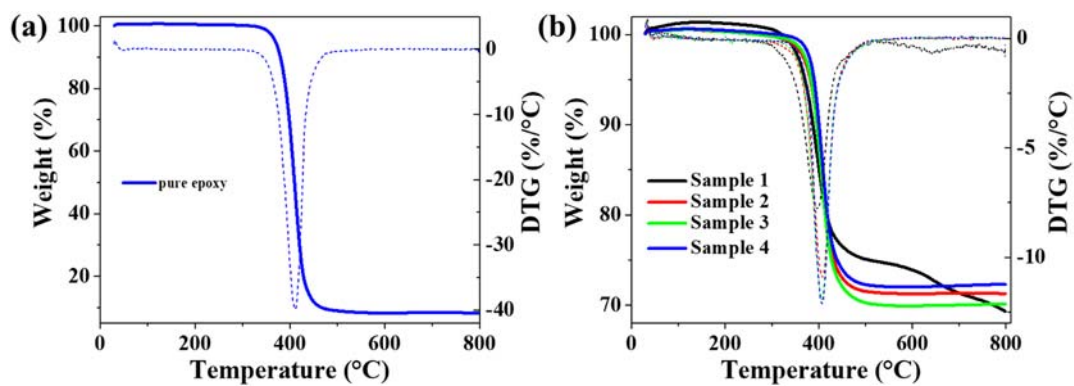

**Figure S3:** Thermal analysis of pure epoxy (a) and CFRP composite (b).

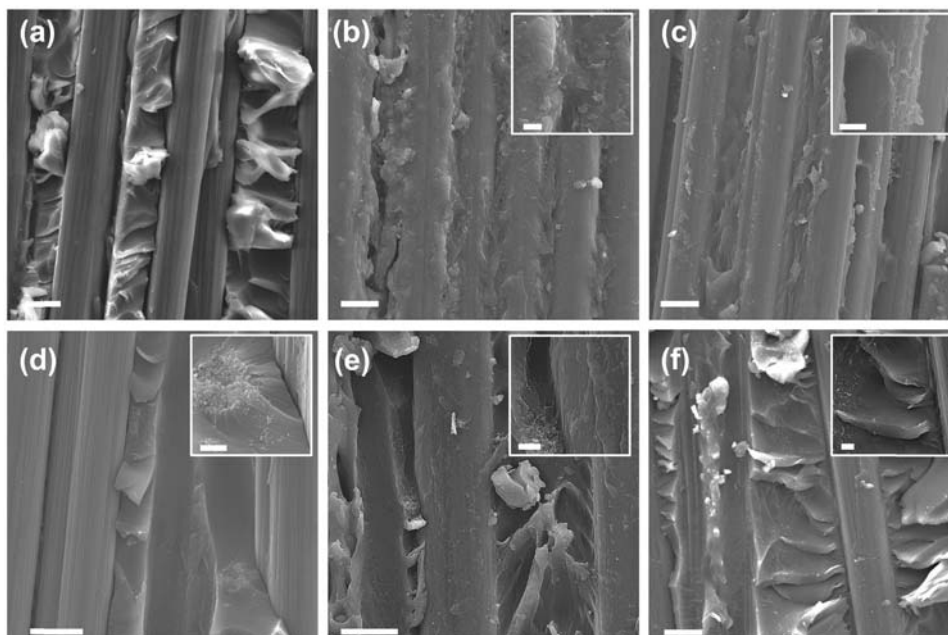

**Figure S4:** SEM images of various CFRP composites after three-point bending test via fiber enhancement (up) and matrix enhancement (down): pure CFRP (a); g-CNTs@CF/EP (b); C-CNTs@CF/EP (c); CF/p-CNTs@EP (d); CF/g-CNTs@EP (e); CF/C-CNTs@EP (f) composite. All the composites with the same nanofiller loading of 0.1 wt%. The scale bar of main and insert images are 5 and 1 μm, respectively.
